# Supplementary material
Source: HighWire-hosted journal article supplement (https://bmjopen.bmj.com/content/15/5/e094112)
Supplement: inline-supplementary-material-1 [file inline-supplementary-material-1.pdf]

Supplement A – Clinical outcomes

| CLINICAL OUTCOMES  | 0 Y | 1Y | 2 Y | 3 Y | 4 Y | 5 Y | 6 Y | 7Y | 8 Y |
|--------------------|-----|----|-----|-----|-----|-----|-----|----|-----|
| HEAD CIRCUMFERENCE | X   | X  | X   | X   | X   | X   | X   | X  | X   |
| PAPILLEDEMA        |     | X  | X   | X   | X   | *   | *   | *  | *   |
| ORTHOPTIC OUTCOMES |     | X  |     |     | X   |     |     |    | X   |
| FOREHEAD SHAPE     | X   |    | X   |     | X   |     | X   |    | X   |

\*only if a decline in head circumference occurs or the child experiences headaches.
